# Supplementary material for: Lewis acidic behavior of B(C6Cl5)3
Source: Royal Society of Chemistry journal article supplement (doi:10.1039/c2dt31482g), 2012-08-13
Supplement: c2dt31482g.pdf [file c2dt31482g.pdf]

## Lewis Acidic Behavior of B(C<sub>6</sub>Cl<sub>5</sub>)<sub>3</sub>

Haiyan Zhao, Joseph H. Reibenspies and François P. Gabbaï\*

*Department of Chemistry, Texas A&M University, College Station, Texas 77843, USA.*

*E-mail: gabbai@mail.chem.tamu.edu*

### Supplementary Information

**General Considerations.** Commercially available chemicals were purchased and used as provided (Commercial sources: Aldrich for Me<sub>3</sub>SiF<sub>2</sub>S(NMe<sub>2</sub>)<sub>3</sub> (TASF), *n*Bu<sub>4</sub>NF, *n*Bu<sub>4</sub>NCN, *n*Bu<sub>4</sub>NN<sub>3</sub>, BCl<sub>3</sub> in *n*-heptane, DMAP; *n*Bu<sub>4</sub>NBr, *n*Bu<sub>4</sub>NI, Ph<sub>4</sub>PCl; Alpha Aesar for *n*-butyllithium (2.6 M in hexanes)). B(C<sub>6</sub>Cl<sub>5</sub>)<sub>3</sub> was prepared by reaction of pentachlorophenyl lithium with BCl<sub>3</sub> as reported by O'Hare (A. E. Ashley; T. J. Herrington; G. G. Wildgoose; H. Zaher; A. L. Thompson; N. H. Rees; T. Krämer; D. O'Hare, *J. Am. Chem. Soc.*, 2011, **133**, 14727-14740). Diethyl ether and THF were dried over Na/K and freshly distilled prior to use. Dichloromethane and pentane were dried over alumina using a pressure driven solvent purification system. Air-sensitive compounds were handled under N<sub>2</sub> atmosphere using standard Schlenk and glovebox techniques. UV-vis spectra were recorded on an Ocean Optics USB4000 spectrometer with an Ocean Optics ISS light source. Elemental analyses were performed at Atlantic Microlab (Norcross, GA). NMR spectra were recorded on a Varian Unity Inova 400 FT NMR (399.59 MHz for <sup>1</sup>H, 376.03 MHz for <sup>19</sup>F, 128.19 MHz for <sup>11</sup>B, 100.45 MHz

for  $^{13}\text{C}$ ) spectrometers at ambient temperature. Chemical shifts  $\delta$  are given in ppm and are referenced against external  $\text{BF}_3 \cdot \text{Et}_2\text{O}$  ( $^{11}\text{B}$  and  $^{19}\text{F}$ ) or  $\text{SiMe}_4$  ( $^1\text{H}$  and  $^{13}\text{C}$ ).

**Crystallography.** The crystallographic measurements were performed using a Bruker APEX-II CCD area detector diffractometer (Mo- $\text{K}_\alpha$  radiation,  $\lambda = 0.71069 \text{ \AA}$ ) for  $[\text{S}(\text{NMe}_2)_3][\text{FB}(\text{C}_6\text{Cl}_5)_3]$  and  $\text{DMAP-B}(\text{C}_6\text{Cl}_5)_3$ . In each case, a specimen of suitable size and quality was selected and mounted onto a nylon loop. The structures were solved by direct methods, which successfully located most of the non-hydrogen atoms. Subsequent refinement on  $F^2$  using the SHELXTL/PC package (version 5.1) allowed location of the remaining non-hydrogen atoms.

**Synthesis of  $[\text{S}(\text{NMe}_2)_3][\text{FB}(\text{C}_6\text{Cl}_5)_3]$ .** TASF (11 mg, 0.040 mmol) was added to a solution of  $\text{B}(\text{C}_6\text{Cl}_5)_3$  (30 mg, 0.040 mmol) in THF (5 mL) at room temperature. The mixture was stirred for ten minutes. The solvent was removed under vacuum to yield a solid which was washed with diethyl ether to afford  $[\text{S}(\text{NMe}_2)_3][\text{FB}(\text{C}_6\text{Cl}_5)_3]$  as a pale product (35 mg, yield 84%). Single crystals were obtained by slow diffusion of pentane into a THF solution of  $[\text{S}(\text{NMe}_2)_3][\text{FB}(\text{C}_6\text{Cl}_5)_3]$  at  $-25^\circ\text{C}$ .  $^1\text{H}$  NMR (399.59 MHz,  $\text{CDCl}_3$ ):  $\delta$  2.96 (N- $\text{CH}_3$ ).  $^{13}\text{C}$  NMR (100.45 MHz,  $\text{CDCl}_3$ ):  $\delta$  38.65 (N- $\text{CH}_3$ ), 129.03, (s, ortho- $\text{C}_6\text{Cl}_5$ ), 130.23, 130.66, 136.89, 137.49 ( $\text{C}_{ipso}$  not detected).  $^{11}\text{B}$  NMR (128.19 MHz,  $\text{CDCl}_3$ ): 6.8 (broad signal).  $^{19}\text{F}$  NMR (376.03 MHz,  $\text{CDCl}_3$ ) -168 (broad). Anal. Calcd for  $\text{C}_{24}\text{H}_{18}\text{BFCl}_{15}\text{S}-1/2\text{THF}$ : C 31.93; H 2.27. Found: C 31.99; H 2.38. (The sample used for EA was obtained by recrystallization from THF. As shown

by X-ray diffraction, these crystals contain one THF molecule per molecule of the fluoroborate. The EA results indicate partial loss of the interstitial THF).

**Synthesis of DMAP-B(C<sub>6</sub>Cl<sub>5</sub>)<sub>3</sub>.** DMAP (5 mg, 0.041 mmol) was added to a solution of B(C<sub>6</sub>Cl<sub>5</sub>)<sub>3</sub> (30 mg, 0.040 mmol) in THF (5 mL) at room temperature. The mixture was stirred for ten minutes. The solvent was removed under vacuum to yield a solid which was washed with diethyl ether to afford B(C<sub>6</sub>Cl<sub>5</sub>)<sub>3</sub>-DMAP as a pale product (28 mg, yield 79%). Single crystals were obtained by slow diffusion of pentane into a THF solution of DMAP-B(C<sub>6</sub>Cl<sub>5</sub>)<sub>3</sub> at -25°C. <sup>1</sup>H NMR (399.59 MHz, THF-*d*<sub>8</sub>): δ 3.17 (s, 6H, N-CH<sub>3</sub>), 6.85 (d, 2H, *meta*-CH, *J* = 7.6 Hz), 7.87 (broad signal, 2H, *ortho*-CH). <sup>13</sup>C NMR (100.45 MHz, THF-*d*<sub>8</sub>): δ 39.61 (N-CH<sub>3</sub>), 107.57 (s, *meta*-NC<sub>5</sub>H<sub>4</sub>), 129.77, 130.45, 131.53 (s, *ortho*-NC<sub>5</sub>H<sub>4</sub>), 137.97, 139.14, 157.90 (s, *para*-NC<sub>5</sub>H<sub>4</sub>). <sup>11</sup>B NMR (128.19 MHz, THF-*d*<sub>8</sub>): 2.0 (s). Anal. Calcd. for C<sub>25</sub>H<sub>10</sub>BCl<sub>15</sub>N<sub>2</sub>-1/3THF: C 34.95; H 1.41. Found: C 34.18; H 1.63. (The sample used for EA was obtained by recrystallization from THF. As shown by X-ray diffraction, these crystals contain 3 THF molecule per molecule of DMAP-B(C<sub>6</sub>Cl<sub>5</sub>)<sub>3</sub>. The EA results indicate partial loss of the interstitial THF).

**UV-vis titration experiments in CH<sub>2</sub>Cl<sub>2</sub>.** To determine the binding constant of B(C<sub>6</sub>Cl<sub>5</sub>)<sub>3</sub> with various Lewis bases (denoted as X), a CH<sub>2</sub>Cl<sub>2</sub> solution of B(C<sub>6</sub>Cl<sub>5</sub>)<sub>3</sub> (3 ml, *c* = 4.84 × 10<sup>-5</sup> M for X = F<sup>-</sup>, *c* = 5.80 × 10<sup>-5</sup> M for X = N<sub>3</sub><sup>-</sup>, *c* = 6.80 × 10<sup>-5</sup> M for X = CN<sup>-</sup>, *c* = 3.48 × 10<sup>-5</sup> M for X = Cl<sup>-</sup>, *c* = 6.84 × 10<sup>-5</sup> M for X = DMAP) inside a UV-cuvette was titrated with incremental amounts of the Lewis base dissolved in CH<sub>2</sub>Cl<sub>2</sub>

(*n*Bu<sub>4</sub>NF for X = F<sup>-</sup> (4.7 mM), *n*Bu<sub>4</sub>NN<sub>3</sub> for X = N<sub>3</sub><sup>-</sup> (30 mM), *n*Bu<sub>4</sub>NCN for X = CN<sup>-</sup> (8.5 mM), Ph<sub>4</sub>PCl for X = Cl<sup>-</sup> (89 mM), or DMAP (26 mM)). All experiments were carried out with dry solvent in an open atmosphere. The absorbance of B(C<sub>6</sub>Cl<sub>5</sub>)<sub>3</sub> was monitored at λ = 331 nm. The binding constants were calculated by fitting the experimental data to a 1:1 binding isotherm. No changes was observed when 5 equivalents of Br<sup>-</sup> or I<sup>-</sup> were added to a CH<sub>2</sub>Cl<sub>2</sub> solution of B(C<sub>6</sub>Cl<sub>5</sub>)<sub>3</sub> (3 ml, c = 4.56 × 10<sup>-5</sup> M for X = Br<sup>-</sup>, and c = 4.53 × 10<sup>-5</sup> M for X = I<sup>-</sup>) indicating the absence of any significant interaction.

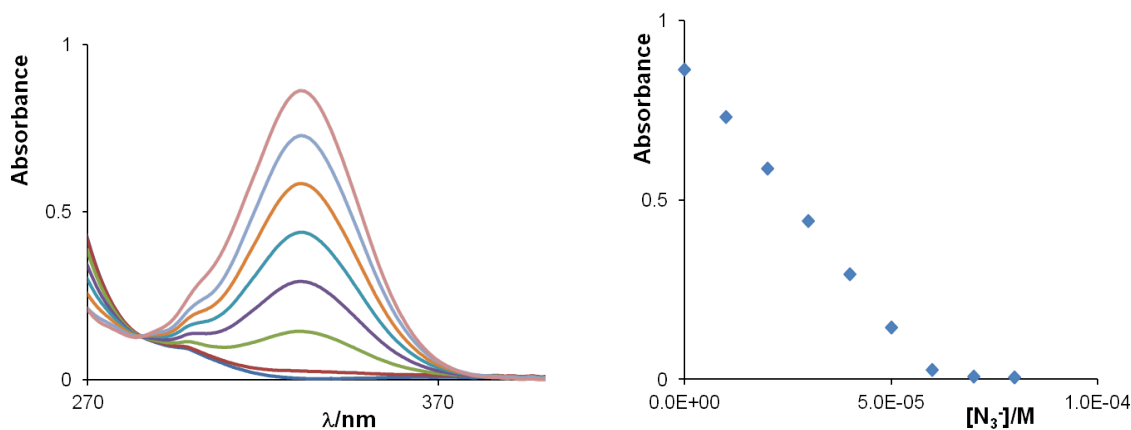

Figure S1. Absorbance changes upon addition of TBAN<sub>3</sub> in CH<sub>2</sub>Cl<sub>2</sub> to a CH<sub>2</sub>Cl<sub>2</sub> solution of B(C<sub>6</sub>Cl<sub>5</sub>)<sub>3</sub> (left) and binding isotherm monitored at λ = 331 nm (right).

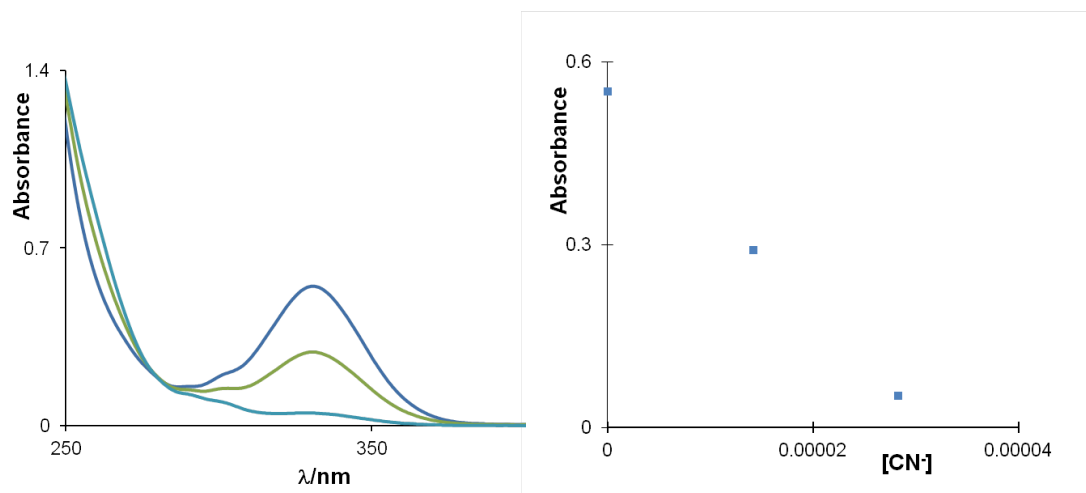

Figure S2. Absorbance changes upon addition of TBACN in CH<sub>2</sub>Cl<sub>2</sub> to a CH<sub>2</sub>Cl<sub>2</sub> solution of B(C<sub>6</sub>Cl<sub>5</sub>)<sub>3</sub> (left) and binding isotherm monitored at λ = 331 nm (right). When 0.91 equiv. CN<sup>-</sup> was added, the quenching of absorbance is ca. 90.4%, indicating the CN<sup>-</sup> binding is quantitative.

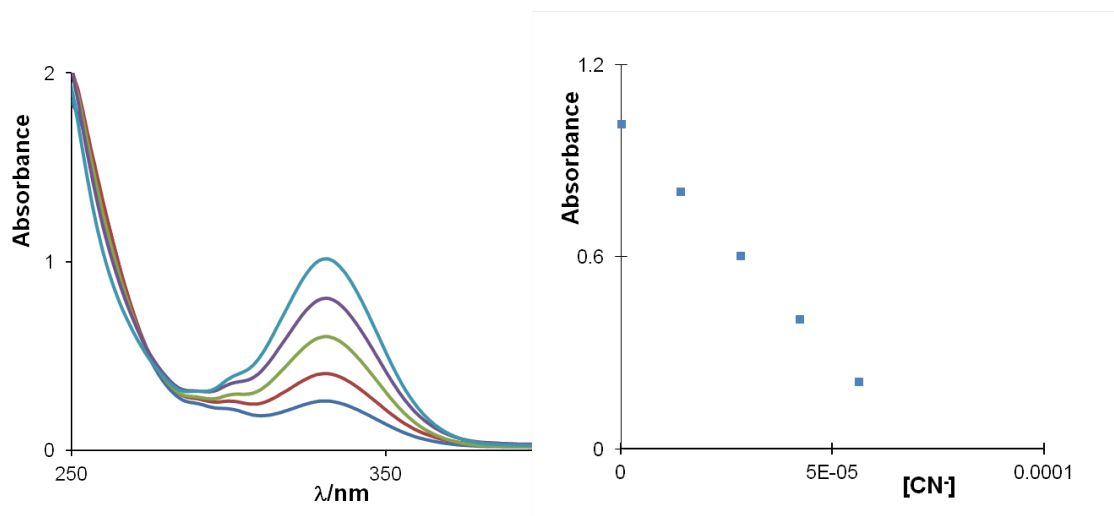

Figure S3. Absorbance changes upon addition of TBACN in  $\text{CH}_2\text{Cl}_2$  to a  $\text{CH}_2\text{Cl}_2$  solution of  $\text{B}(\text{C}_6\text{Cl}_5)_3$  (left) and binding isotherm monitored at  $\lambda = 331 \text{ nm}$  (right). The binding process is slow such that the titration could not be completed.

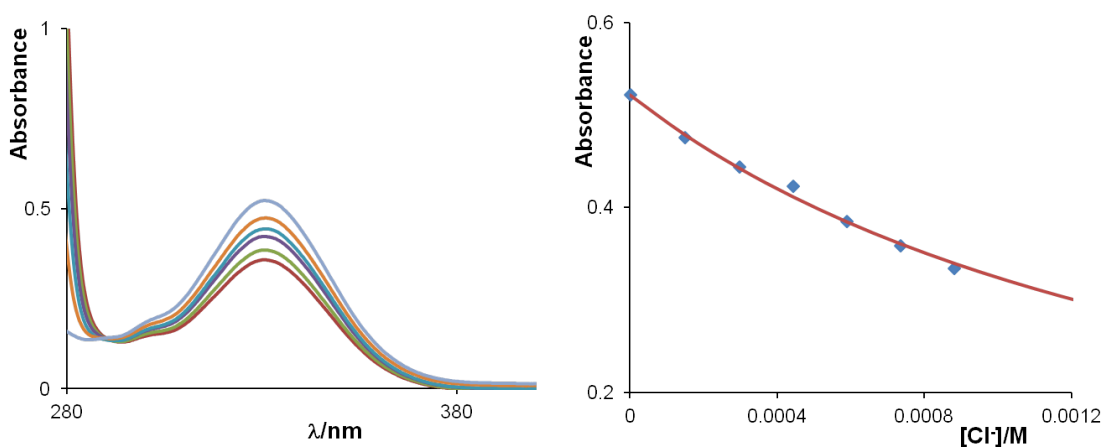

Figure S3. Absorbance changes upon addition of  $\text{PPh}_4\text{Cl}$  in  $\text{CH}_2\text{Cl}_2$  to a  $\text{CH}_2\text{Cl}_2$  solution of  $\text{B}(\text{C}_6\text{Cl}_5)_3$  (left) and binding isotherm monitored at  $\lambda = 331 \text{ nm}$ . The data could be satisfactorily modeled with  $K = 600 (\pm 50) \text{ M}^{-1}$  ( $\epsilon = 15000$  for  $\text{B}(\text{C}_6\text{Cl}_5)_3$ ,  $\epsilon = 0$  for  $[\text{ClB}(\text{C}_6\text{Cl}_5)_3]$ ) (right).

**UV-vis titration experiments in THF.** To determine the binding constant of  $\text{B}(\text{C}_6\text{Cl}_5)_3$  with DMAP and pyridine, a THF solution of  $\text{B}(\text{C}_6\text{Cl}_5)_3$  (3 ml,  $c = 5.40 \times 10^{-5} \text{ M}$  for DMAP and  $7.00 \times 10^{-5} \text{ M}$  for pyridine) was placed inside a UV-cuvette and titrated with incremental amounts of the Lewis base dissolved in THF (9.9 mM for

DMAP, and 12.36 M for pyridine). The absorbance of  $B(C_6Cl_5)_3$  was monitored at  $\lambda = 331$  nm. The binding constants were calculated by fitting the experimental data to a 1:1 binding isotherm.

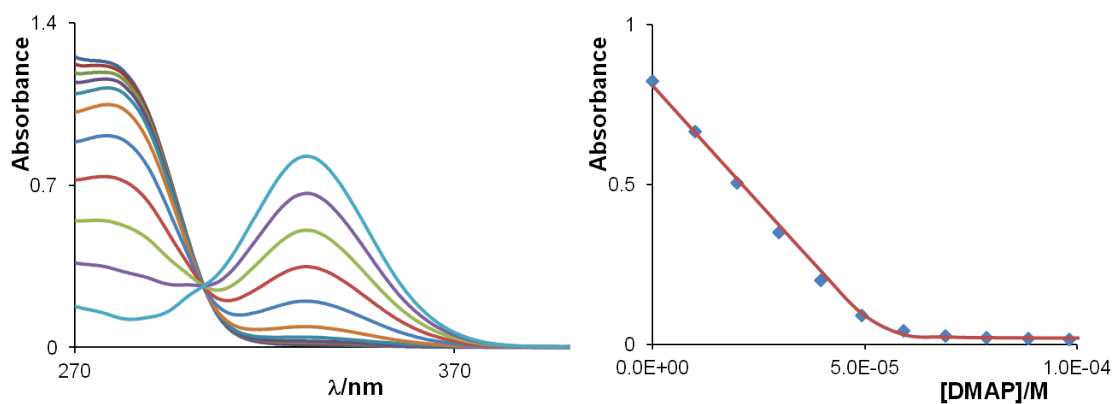

Figure S4. Absorbance changes upon addition of DMAP in THF to a THF solution of  $B(C_6Cl_5)_3$  (left) and binding isotherm monitored at  $\lambda = 331$  nm. The data could be satisfactorily modeled with  $K = 1.0 (\pm 0.1) \times 10^7 M^{-1}$  ( $\epsilon = 15000$  for  $B(C_6Cl_5)_3$ ,  $\epsilon = 0$  for DMAP- $B(C_6Cl_5)_3$ ) (right).

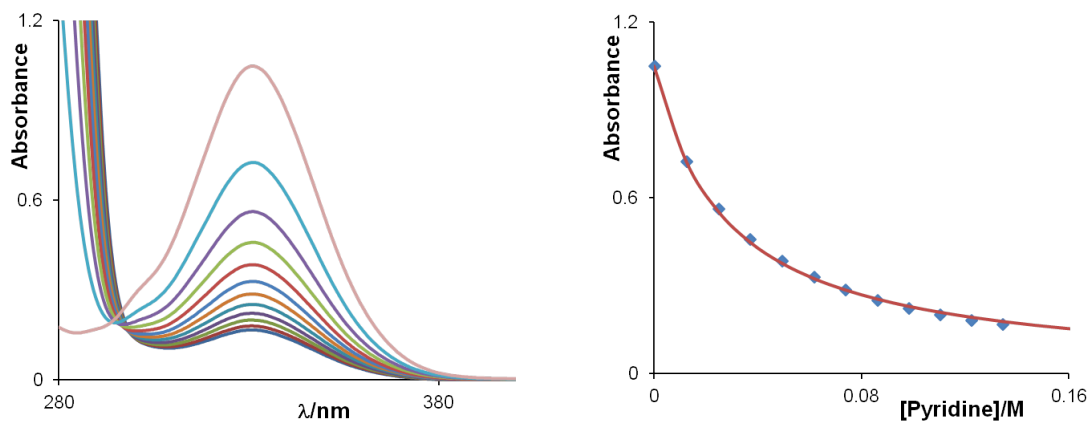

Figure S5. Absorbance changes upon addition of pyridine to a THF solution of  $B(C_6Cl_5)_3$  (left) and binding isotherm monitored at  $\lambda = 331$  nm. The data could be satisfactorily modeled with  $K = 36 (\pm 4) M^{-1}$  ( $\epsilon = 15000$  for  $B(C_6Cl_5)_3$ ,  $\epsilon = 0$  for pyridine- $B(C_6Cl_5)_3$ ) (right).

**Computational details.** DFT calculations (full geometry optimization) were carried out with the Gaussian 03 program using the gradient-corrected Becke exchange functional (B3LYP) and the Lee-Yang-Parr correlation functional. Geometry optimization was carried out with the following mixed basis set: 6-31+g(d') for the boron, carbon, hydrogen and fluorine atoms, 6-31+g(d) for the chlorine atoms. Frequency calculations, which were carried out on the optimized structure of the compounds, confirmed the absence of any imaginary frequencies. To calculate the fluoride ion affinity (FIA) of the boranes, the optimized geometries of the boranes ( $BPh_3$ ,  $B(C_6F_5)_3$ ,  $B(C_6Cl_5)_3$ ) and fluoroborates ( $[FBPh_3]^+$ ,  $[FB(C_6F_5)_3]^+$ ,  $[FB(C_6Cl_5)_3]^+$ ) were



subjected to a single-point energy calculation using the gradient-corrected Becke exchange functional (B3LYP) and the Lee-Yang-Parr correlation functional and the 6-311+g(2d,p) basis set for all atoms. The fluoride ion affinities were calculated as shown in eq 1 (FIA =  $-\Delta H$ ). The reaction enthalpies  $\Delta H$  were derived from the energy of each molecule (from the single-point calculation) corrected to enthalpy by the “thermal correction to enthalpy term” obtained in the frequency calculations (Table S1).

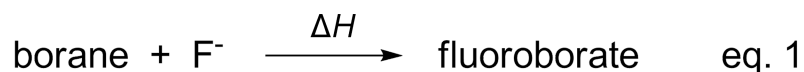

Table S1. Computed energies in Hartree

|                                                                  | SCF Energies | Correction to enthalpy term | Enthalpy     |
|------------------------------------------------------------------|--------------|-----------------------------|--------------|
| BPh <sub>3</sub>                                                 | -720.0230278 | 0.292782                    | -719.7302458 |
| [FBPh <sub>3</sub> ] <sup>-</sup>                                | -820.0187719 | 0.294027                    | -819.7247449 |
| B(C <sub>6</sub> F <sub>5</sub> ) <sub>3</sub>                   | -2208.989185 | 0.183468                    | -2208.805717 |
| [FB(C <sub>6</sub> F <sub>5</sub> ) <sub>3</sub> ] <sup>-</sup>  | -2309.035134 | 0.185668                    | -2308.849466 |
| B(C <sub>6</sub> Cl <sub>5</sub> ) <sub>3</sub>                  | -7614.29414  | 0.164988                    | -7614.129152 |
| [FB(C <sub>6</sub> Cl <sub>5</sub> ) <sub>3</sub> ] <sup>-</sup> | -7714.32235  | 0.167566                    | -7714.154784 |
| F <sup>-</sup>                                                   | -99.8886932  | 0.00236                     | -99.8863332  |

Optimized geometry of BPh<sub>3</sub>:

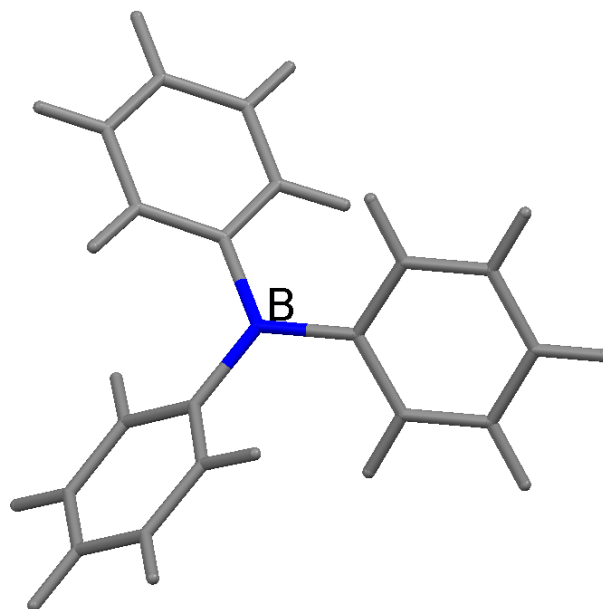

Cartesian coordinates for the optimized geometry of BPh<sub>3</sub>:

| Atom | x         | y         | z         | C | -1.564550 | 3.354226  | -1.104111 |
|------|-----------|-----------|-----------|---|-----------|-----------|-----------|
| B    | 0.020109  | -0.066527 | -0.106619 | C | -0.887205 | 2.358826  | -0.395050 |
| C    | -0.004555 | -0.075390 | 1.463911  | H | -0.067041 | -0.098131 | 5.391689  |
| C    | 1.113483  | -0.499027 | 2.218727  | H | 1.985040  | -0.808200 | 4.168697  |
| C    | 1.101445  | -0.492966 | 3.615885  | H | 2.013411  | -0.823742 | 1.699399  |
| C    | -0.049771 | -0.091863 | 4.302927  | H | -2.029359 | 0.670688  | 1.643783  |
| C    | -1.178572 | 0.317413  | 3.584217  | H | -2.079348 | 0.626387  | 4.112294  |
| C    | -1.146290 | 0.339688  | 2.187520  | H | 0.449874  | -2.749800 | 0.544188  |
| C    | 0.825275  | -1.167682 | -0.885524 | H | 1.690440  | -4.488449 | -0.695530 |
| C    | 0.936405  | -2.488894 | -0.394008 | H | 2.840113  | -3.920973 | -2.832735 |
| C    | 1.638196  | -3.475423 | -1.091482 | H | 2.705876  | -1.599733 | -3.729502 |
| C    | 2.281448  | -3.157853 | -2.293004 | H | 1.413449  | 0.123307  | -2.521109 |
| C    | 2.203686  | -1.854943 | -2.797632 | H | -1.295955 | -0.228092 | -2.566902 |
| C    | 1.472482  | -0.882953 | -2.110082 | H | -0.431977 | 2.608231  | 0.561784  |
| C    | -0.760547 | 1.043318  | -0.898034 | H | -1.629106 | 4.362671  | -0.698390 |
| C    | -1.367516 | 0.773400  | -2.146259 | H | -2.707658 | 3.821331  | -2.878936 |
| C    | -2.074965 | 1.754069  | -2.846284 | H | -2.546545 | 1.510047  | -3.796952 |
| C    | -2.167974 | 3.051300  | -2.329799 |   |           |           |           |

Optimized geometry of [FBPh<sub>3</sub>]<sup>-</sup>:

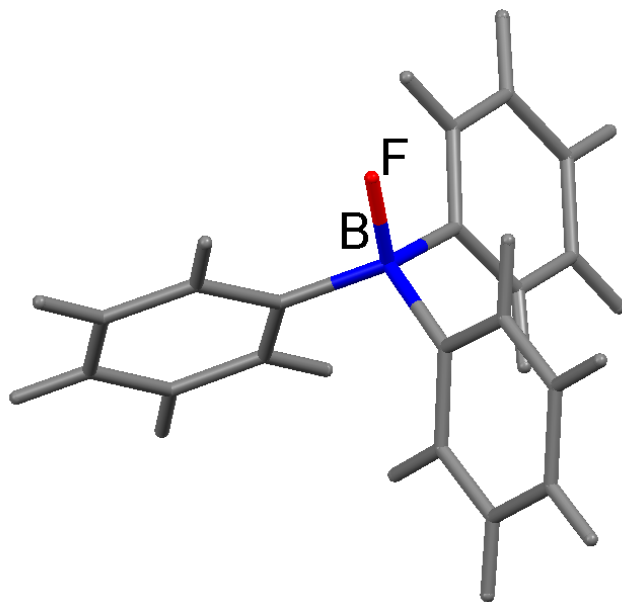

Cartesian coordinates for the optimized geometry of [FBPh<sub>3</sub>]<sup>-</sup>:

| Atom | x         | y         | z         | C | -1.539239 | -2.101715 | -2.405404 |
|------|-----------|-----------|-----------|---|-----------|-----------|-----------|
| C    | 0.071865  | -0.000652 | -0.044097 | F | -2.363982 | -0.630948 | -0.097475 |
| C    | 0.037544  | -0.111791 | 1.361989  | B | -1.333214 | 0.062054  | -0.895201 |
| C    | 1.201734  | -0.139388 | 2.138923  | H | -3.918341 | 1.099204  | -0.897774 |
| C    | 2.459747  | -0.053674 | 1.528545  | H | -4.780696 | 3.392356  | -1.272574 |
| C    | 2.527723  | 0.051902  | 0.134962  | H | -3.193684 | 5.274501  | -1.704968 |
| C    | 1.352137  | 0.072376  | -0.628312 | H | -0.737625 | 4.813030  | -1.738595 |
| C    | -1.838457 | 1.611874  | -1.110729 | H | 1.129074  | -0.229087 | 3.224407  |
| C    | -0.973004 | 2.698995  | -1.345490 | H | 0.104387  | 2.529249  | -1.343252 |
| C    | -1.445187 | 4.000932  | -1.562175 | H | -0.933139 | -0.185413 | 1.850901  |
| C    | -2.819485 | 4.263250  | -1.541484 | H | 3.370425  | -0.075048 | 2.128193  |
| C    | -3.705526 | 3.205549  | -1.299185 | H | 3.498333  | 0.109066  | -0.360904 |
| C    | -3.217188 | 1.910325  | -1.090450 | H | -0.501545 | 0.923250  | -3.524516 |
| C    | -1.204441 | -0.733406 | -2.328047 | H | -1.910926 | -2.594179 | -1.507573 |
| C    | -0.747129 | -0.139371 | -3.521335 | H | 1.436948  | 0.130209  | -1.714148 |
| C    | -0.615122 | -0.860657 | -4.716043 | H | -0.258051 | -0.358653 | -5.616999 |
| C    | -0.950428 | -2.218500 | -4.758551 | H | -0.854071 | -2.784871 | -5.685532 |
| C    | -1.418923 | -2.835535 | -3.591411 | H | -1.691881 | -3.892352 | -3.607079 |

Optimized geometry of  $B(C_6F_5)_3$ :

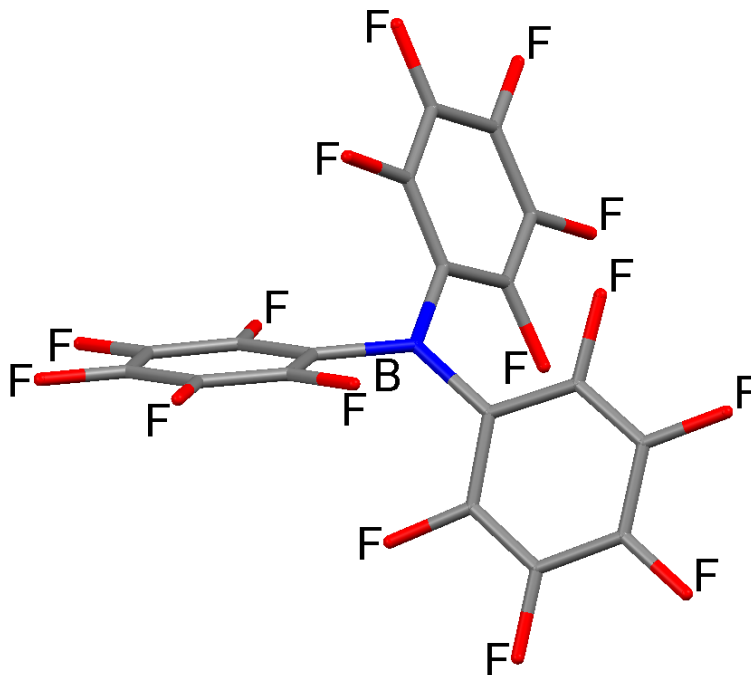

Cartesian coordinates for the optimized geometry of  $B(C_6F_5)_3$

| Atom | x         | y         | z         |
|------|-----------|-----------|-----------|
| B    | -0.001586 | 0.000810  | 0.000152  |
| C    | 1.364014  | -0.775119 | 0.006908  |
| C    | 2.456295  | -0.362501 | 0.786188  |
| C    | 3.668708  | -1.043795 | 0.815134  |
| C    | 3.832125  | -2.177506 | 0.019085  |
| C    | 2.780509  | -2.620869 | -0.782910 |
| C    | 1.574452  | -1.927975 | -0.765890 |
| C    | -0.011679 | 1.571244  | -0.003452 |
| C    | 0.891374  | 2.324605  | -0.770254 |
| C    | 0.890508  | 3.715423  | -0.795270 |
| C    | -0.027579 | 4.410225  | -0.007890 |
| C    | -0.938182 | 3.707563  | 0.781227  |
| C    | -0.923595 | 2.316763  | 0.760532  |
| C    | -1.355665 | -0.794803 | -0.003473 |
| C    | -2.456645 | -0.397239 | -0.778596 |
| C    | -3.658331 | -1.097371 | -0.806076 |
| C    | -3.801880 | -2.235661 | -0.012793 |
| C    | -2.741463 | -2.664451 | 0.785497  |
| C    | -1.546440 | -1.952709 | 0.767195  |
| F    | 1.755993  | 4.389237  | -1.558953 |
| F    | -0.034906 | 5.741462  | -0.009789 |
| F    | -1.811582 | 4.373991  | 1.542350  |
| F    | -1.816892 | 1.687000  | 1.545284  |
| F    | 1.790987  | 1.702187  | -1.553701 |
| F    | 2.346750  | 0.720104  | 1.577845  |
| F    | 4.673489  | -0.625094 | 1.590666  |
| F    | 4.989630  | -2.835152 | 0.024793  |
| F    | 2.940860  | -3.701648 | -1.552683 |
| F    | 0.594316  | -2.391416 | -1.562964 |
| F    | -0.557630 | -2.402758 | 1.561066  |
| F    | -2.883131 | -3.749366 | 1.553074  |
| F    | -4.671677 | -0.692344 | -1.577657 |
| F    | -2.366857 | 0.688821  | -1.567801 |
| F    | -4.948869 | -2.911418 | -0.017372 |

Optimized geometry of  $[\text{FB}(\text{C}_6\text{F}_5)_3]$ :

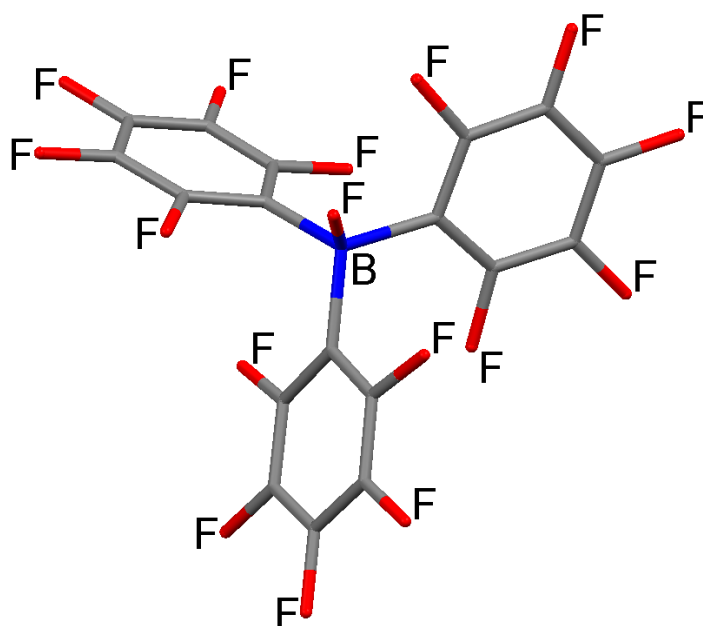

Cartesian coordinates for the optimized geometry of  $[\text{FB}(\text{C}_6\text{F}_5)_3]$ :

| Atom | x         | y         | z         |   |           |           |           |
|------|-----------|-----------|-----------|---|-----------|-----------|-----------|
| C    | -0.092677 | 1.590778  | 0.305523  | C | 2.619714  | -0.387390 | 0.954596  |
| C    | -0.974802 | 2.457573  | 0.961876  | F | 0.004698  | 0.000980  | 2.217359  |
| C    | -1.079540 | 3.818155  | 0.677058  | B | 0.001985  | -0.000263 | 0.782605  |
| C    | -0.284545 | 4.373715  | -0.320066 | F | -1.949472 | 4.603236  | 1.346137  |
| C    | 0.593833  | 3.552979  | -1.016712 | F | -0.369774 | 5.686558  | -0.609917 |
| C    | 0.665969  | 2.196801  | -0.696872 | F | -1.815716 | 1.992177  | 1.910329  |
| C    | -1.330123 | -0.876271 | 0.308146  | F | 2.642041  | 0.573628  | 1.902769  |
| C    | -2.223033 | -0.529676 | -0.706716 | F | 4.966535  | -0.618930 | 1.329385  |
| C    | -3.362306 | -1.267967 | -1.028415 | F | 1.363087  | 4.077205  | -1.993619 |
| C    | -3.646512 | -2.429187 | -0.320446 | F | -2.012551 | 0.571129  | -1.470866 |
| C    | -2.778732 | -2.833186 | 0.688832  | F | 0.502249  | -2.057519 | -1.451678 |
| C    | -1.651234 | -2.064886 | 0.974866  | F | 2.839574  | -3.217911 | -2.005709 |
| C    | 1.425157  | -0.715917 | 0.302434  | F | 5.105184  | -2.527061 | -0.628724 |
| C    | 1.565900  | -1.674632 | -0.701962 | F | -4.189466 | -0.871612 | -2.018222 |
| C    | 2.774548  | -2.291308 | -1.026867 | F | -3.035448 | -3.970309 | 1.368474  |
| C    | 3.927363  | -1.943532 | -0.333757 | F | -0.838009 | -2.555161 | 1.934868  |
| C    | 3.848613  | -0.978069 | 0.664494  | F | -4.742478 | -3.156605 | -0.611286 |
|      |           |           |           | F | 1.530855  | 1.471075  | -1.448813 |

Optimized geometry of  $B(C_6Cl_5)_3$ :

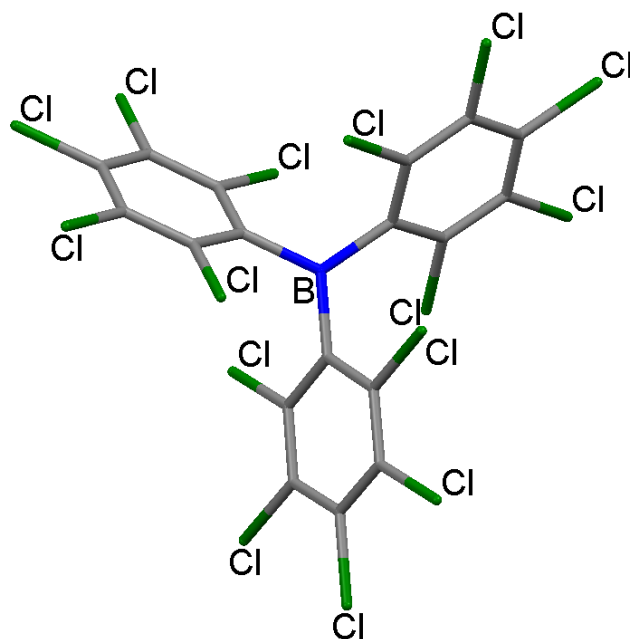

Cartesian coordinates for the optimized geometry of  $B(C_6Cl_5)_3$ :

| Atom | x         | y         | z         |
|------|-----------|-----------|-----------|
| B    | -0.005494 | 0.000110  | 0.000849  |
| C    | 0.752245  | 1.402597  | -0.001976 |
| C    | 0.481298  | 2.393487  | 0.962130  |
| C    | 1.145882  | 3.630371  | 0.979075  |
| C    | 2.114142  | 3.906296  | -0.002444 |
| C    | 2.408026  | 2.943619  | -0.984134 |
| C    | 1.730773  | 1.713739  | -0.966880 |
| C    | -1.598583 | -0.047119 | 0.000364  |
| C    | -2.360644 | 0.645301  | -0.961618 |
| C    | -3.764284 | 0.611100  | -0.978543 |
| C    | -4.447741 | -0.132918 | -0.000623 |
| C    | -3.721480 | -0.834432 | 0.977814  |
| C    | -2.318345 | -0.783845 | 0.961957  |
| C    | 0.834062  | -1.355074 | 0.003138  |
| C    | 0.621889  | -2.360241 | -0.960977 |
| C    | 1.358646  | -3.555492 | -0.978709 |
| C    | 2.342141  | -3.773808 | 0.002115  |
| C    | 2.578571  | -2.795797 | 0.984136  |
| C    | 1.829588  | -1.608227 | 0.967561  |
| Cl   | -0.667342 | 2.055675  | 2.236065  |
| Cl   | 0.787846  | 4.813077  | 2.198274  |
| Cl   | 2.942842  | 5.428716  | -0.002733 |
| Cl   | 3.595211  | 3.284618  | -2.203909 |
| Cl   | 2.069319  | 0.566710  | -2.241869 |
| Cl   | -1.541316 | 1.521654  | -2.232987 |
| Cl   | -4.657712 | 1.471440  | -2.193063 |
| Cl   | -6.180199 | -0.184826 | -0.001089 |
| Cl   | -4.562318 | -1.747121 | 2.191657  |
| Cl   | -1.448380 | -1.608269 | 2.234389  |
| Cl   | -0.545730 | -2.091348 | -2.234042 |
| Cl   | 1.070402  | -4.757170 | -2.197870 |
| Cl   | 3.259814  | -5.244209 | 0.001322  |
| Cl   | 3.783889  | -3.066556 | 2.203716  |
| Cl   | 2.099993  | -0.443985 | 2.243265  |

Optimized geometry of  $[\text{FB}(\text{C}_6\text{Cl}_5)_3]^-$ :

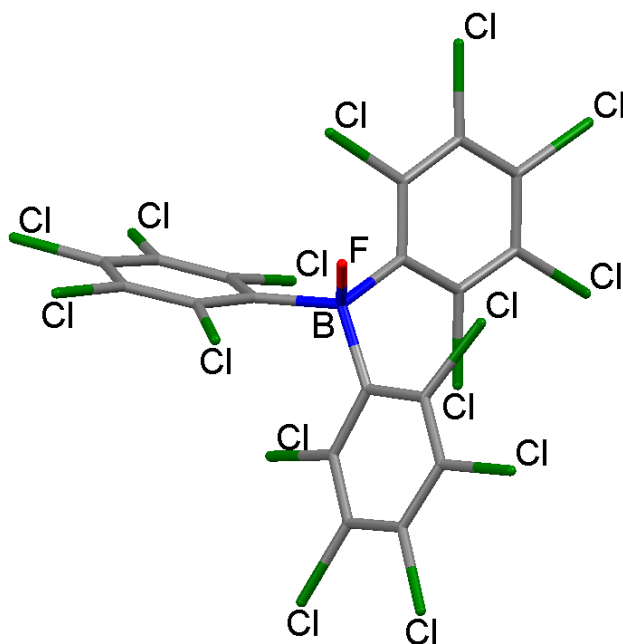

Cartesian coordinates for the optimized geometry of  $[\text{FB}(\text{C}_6\text{Cl}_5)_3]^-$ :

| Atom | x         | y         | z         |    |           |           |           |
|------|-----------|-----------|-----------|----|-----------|-----------|-----------|
| C    | -0.142978 | 1.630480  | 0.165314  | C  | 2.629750  | -0.339074 | 0.922264  |
| C    | -1.023957 | 2.444302  | 0.915565  | Cl | -2.232383 | 1.718411  | 1.962796  |
| C    | -1.039792 | 3.848366  | 0.828144  | Cl | -2.127471 | 4.803894  | 1.807422  |
| C    | -0.172159 | 4.499546  | -0.059653 | Cl | -0.145815 | 6.242488  | -0.155110 |
| C    | 0.658885  | 3.730690  | -0.884457 | Cl | 1.698442  | 4.535076  | -2.036680 |
| C    | 0.643100  | 2.328171  | -0.773149 | Cl | 1.611213  | 1.447921  | -1.945444 |
| C    | -1.341684 | -0.942050 | 0.163602  | Cl | -2.051813 | 0.660956  | -1.955507 |
| C    | -2.336808 | -0.611021 | -0.777418 | Cl | -4.775848 | -0.796638 | -2.040945 |
| C    | -3.561609 | -1.294796 | -0.886575 | Cl | -5.341865 | -3.238000 | -0.149787 |
| C    | -3.816072 | -2.394785 | -0.057472 | Cl | -3.108434 | -4.236407 | 1.816001  |
| C    | -2.819890 | -2.821037 | 0.831880  | Cl | -0.377971 | -2.793697 | 1.965179  |
| C    | -1.609617 | -2.108923 | 0.917168  | Cl | 0.456782  | -2.120498 | -1.946193 |
| C    | 1.486432  | -0.694145 | 0.168471  | Cl | 3.086078  | -3.741060 | -2.030231 |
| C    | 1.699875  | -1.723385 | -0.770008 | Cl | 5.482762  | -2.997741 | -0.143439 |
| C    | 2.906775  | -2.438483 | -0.878493 | Cl | 5.223216  | -0.563098 | 1.819384  |
| C    | 3.986249  | -2.103587 | -0.051023 | Cl | 2.602427  | 1.068755  | 1.971657  |
| C    | 3.853968  | -1.027065 | 0.836990  | F  | -0.003369 | -0.002495 | 2.003133  |
|      |           |           |           | B  | 0.000226  | -0.002065 | 0.565258  |
